# Supplementary material for: Spin-orbital effects in metal-dichalcogenide semiconducting monolayers
Source: PubMed Central journal article supplement (PMC4837337; doi:10.1038/srep24093), 2016-04-20
Supplement: srep24093-s1.pdf [file srep24093-s1.pdf]

# Supplementary Information for: Spin-orbital effects in metal-dichalcogenide semiconducting monolayers

J. A. Reyes-Retana<sup>1,\*</sup> and F. Cervantes-Sodi<sup>1</sup>

<sup>1</sup>Universidad Iberoamericana, Departamento de Física y Matemáticas, Prolongación Paseo de la Reforma 880,  
Lomas de Santa Fe, DF, 01219, México

\*angelreyes@qe-ibero.com

## ABSTRACT

Metal-dioxide & metal-dichalcogenide monolayers are studied by means of Density Functional Theory. For an accurate reproduction of the electronic structure of transition metal systems, the spin orbit interaction is considered by using fully relativistic pseudopotentials (FRUP). The electronic and spin properties of  $MX_2$  ( $M=Sc, Cr, Mn, Ni, Mo$  &  $W$  and  $X=O, S, Se$  &  $Te$ ) were obtained with FRUP, compared with the scalar relativistic pseudopotentials (SRUP) and with the available experimental results. Among the differences between FRUP and SRUP calculations are giant splittings of the valence band, substantial band gap reduction and semiconductor to metal or non-magnetic to magnetic “transitions”.  $MoO_2, MoS_2, MoSe_2, MoTe_2, WO_2, WS_2$  and  $WSe_2$  are proposed as candidates for spintronics, while  $CrTe_2$ , with  $\mu \sim 1.59\mu_B$ , is a magnetic metal to be experimentally explored.

## Band Structures and Density of States

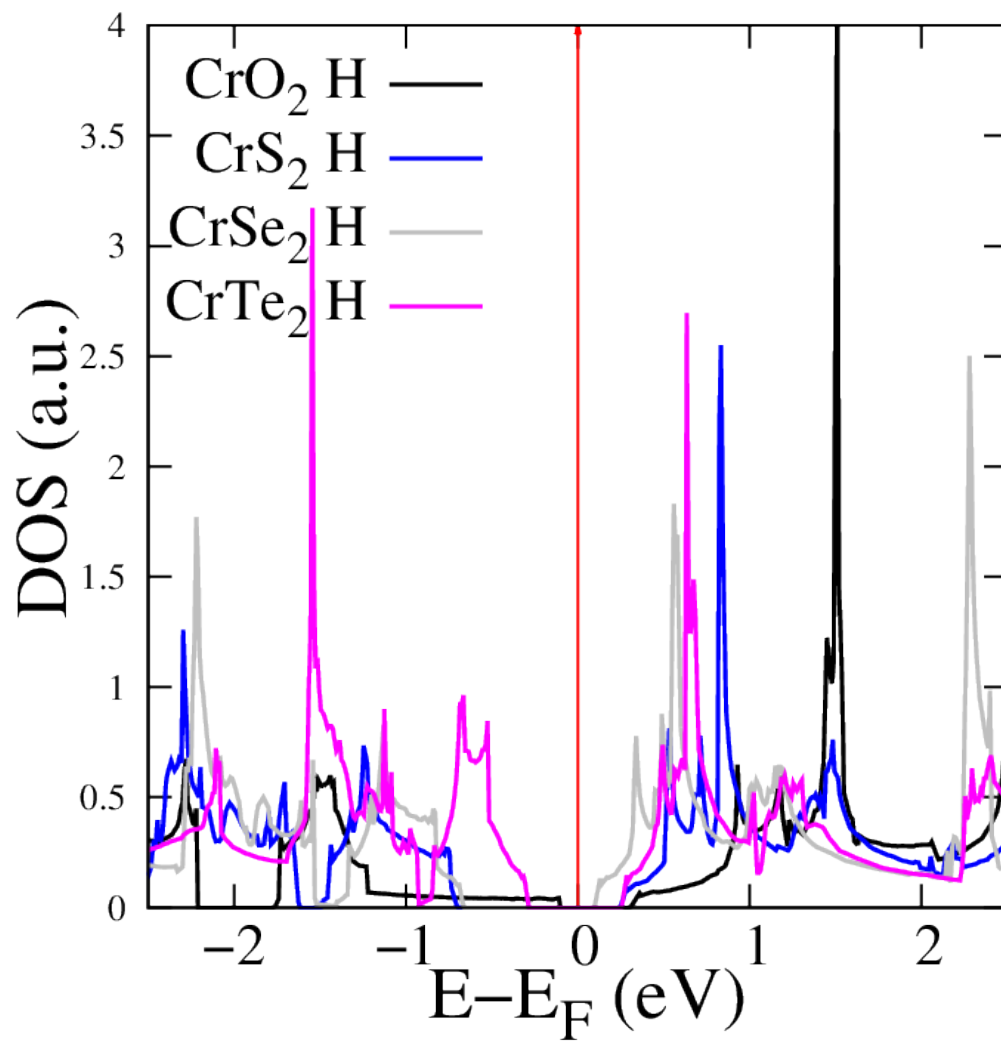

**Supplementary 1.** DOS of  $\text{CrX}_2$ , where  $X = \text{O}, \text{S}, \text{Se}$  and  $\text{Te}$ , as obtained with SRUP.

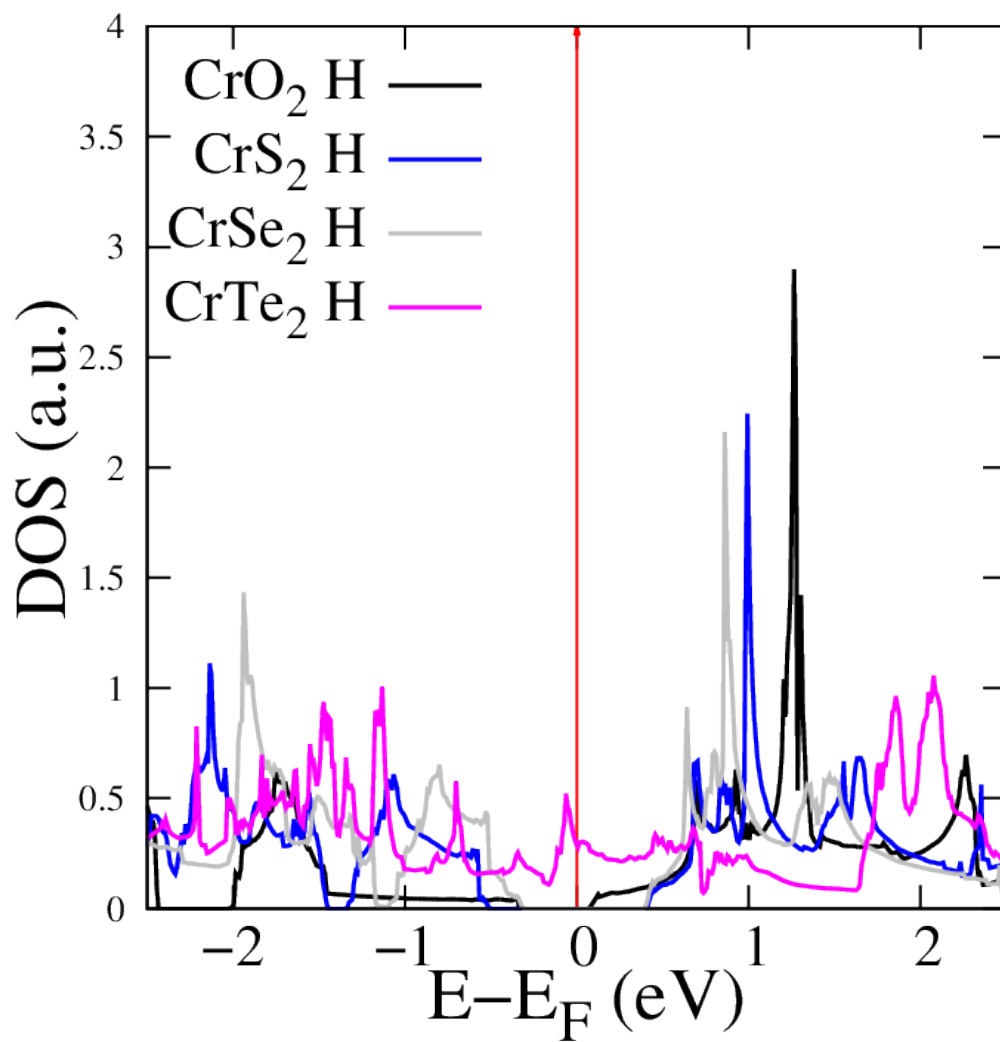

**Supplementary 2.** DOS of  $\text{CrX}_2$ , where  $X = \text{O}, \text{S}, \text{Se}$  and  $\text{Te}$ , as obtained with FRUP.

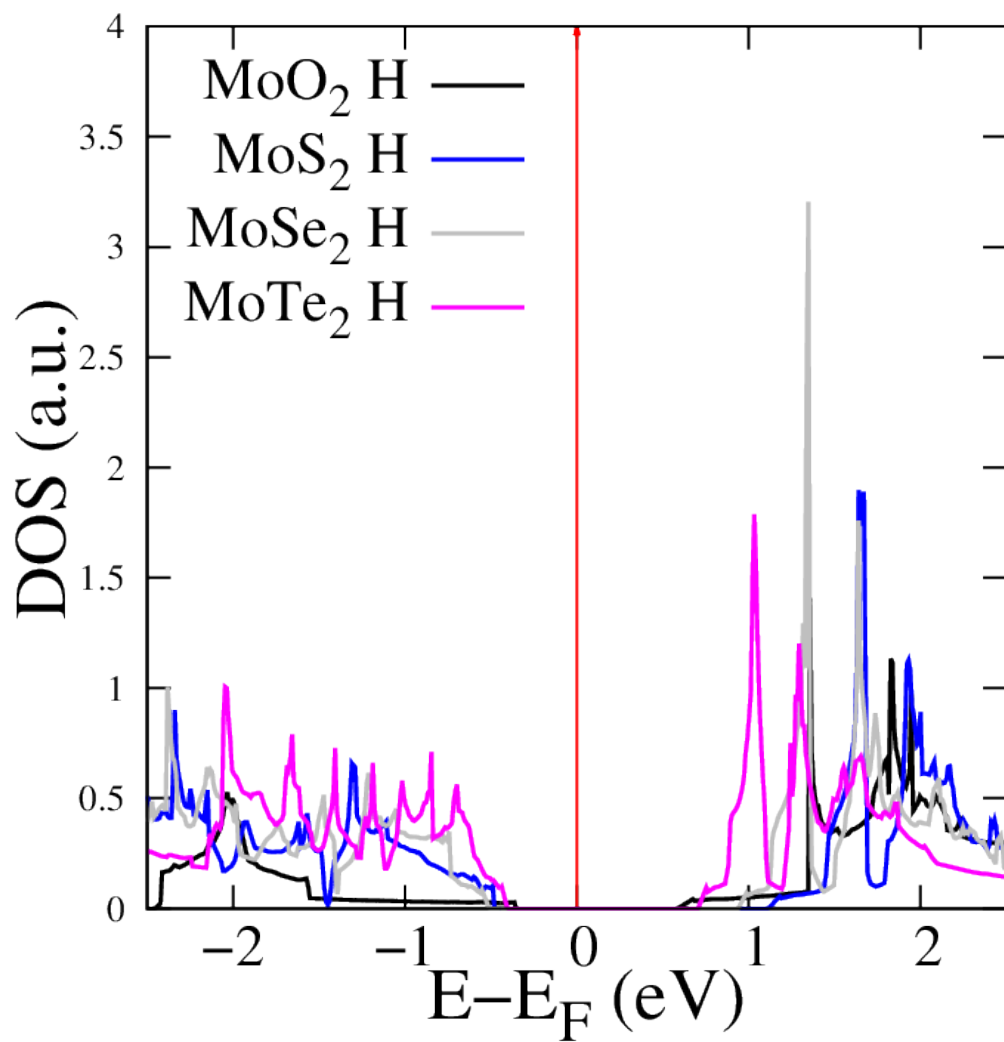

**Supplementary 3.** DOS of MoX<sub>2</sub>, where X= O, S, Se and Te, as obtained with SRUP.

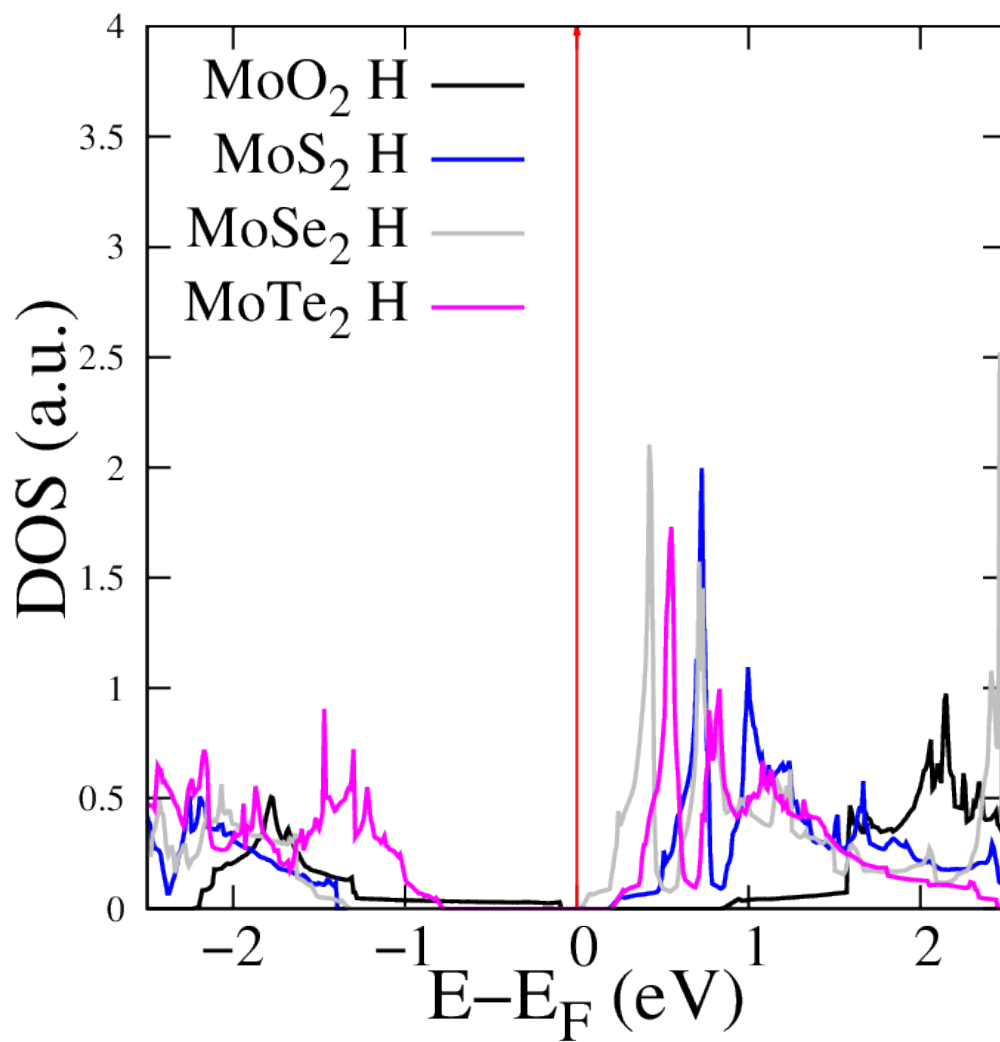

**Supplementary 4.** DOS of MoX<sub>2</sub>, where X= O, S, Se and Te, as obtained with FRUP.

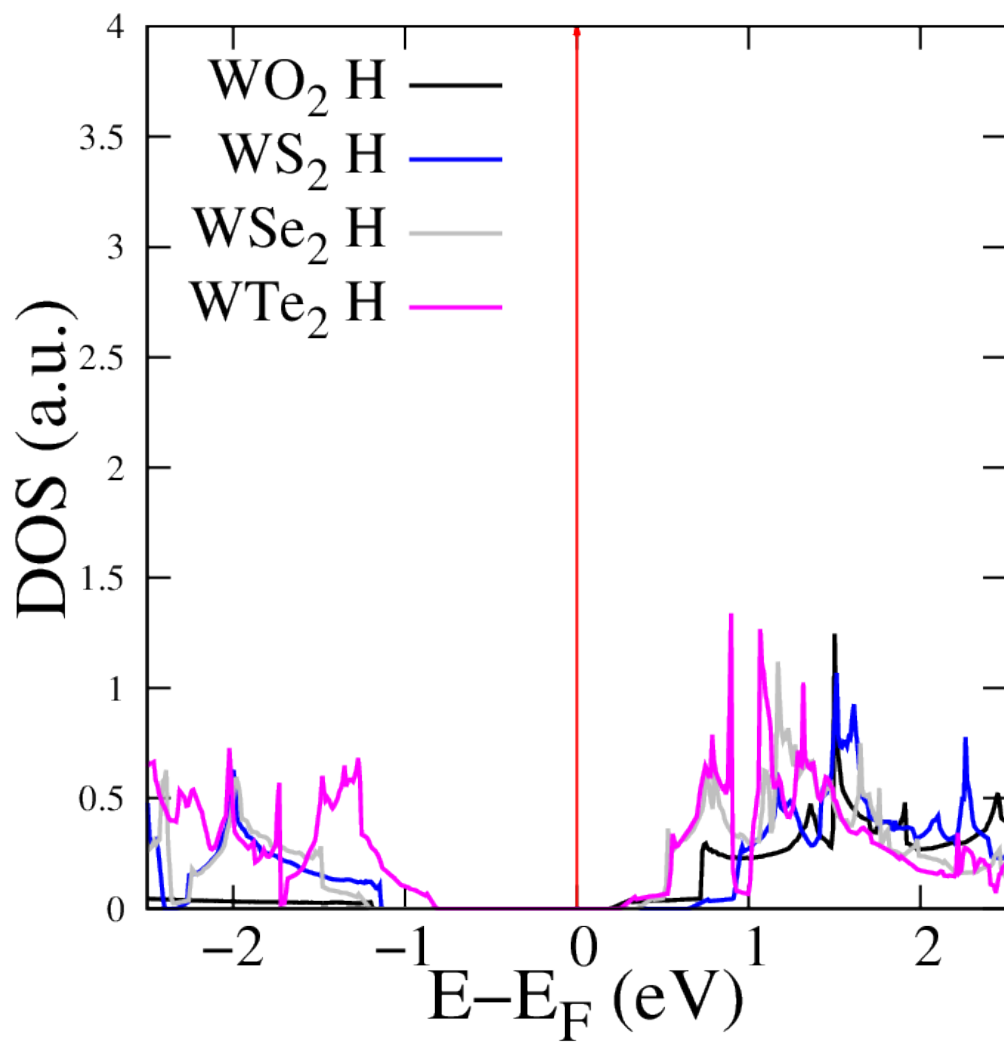

**Supplementary 5.** DOS of  $\text{WX}_2$ , where  $X = \text{O}, \text{S}, \text{Se}$  and  $\text{Te}$ , as obtained with SRUP.

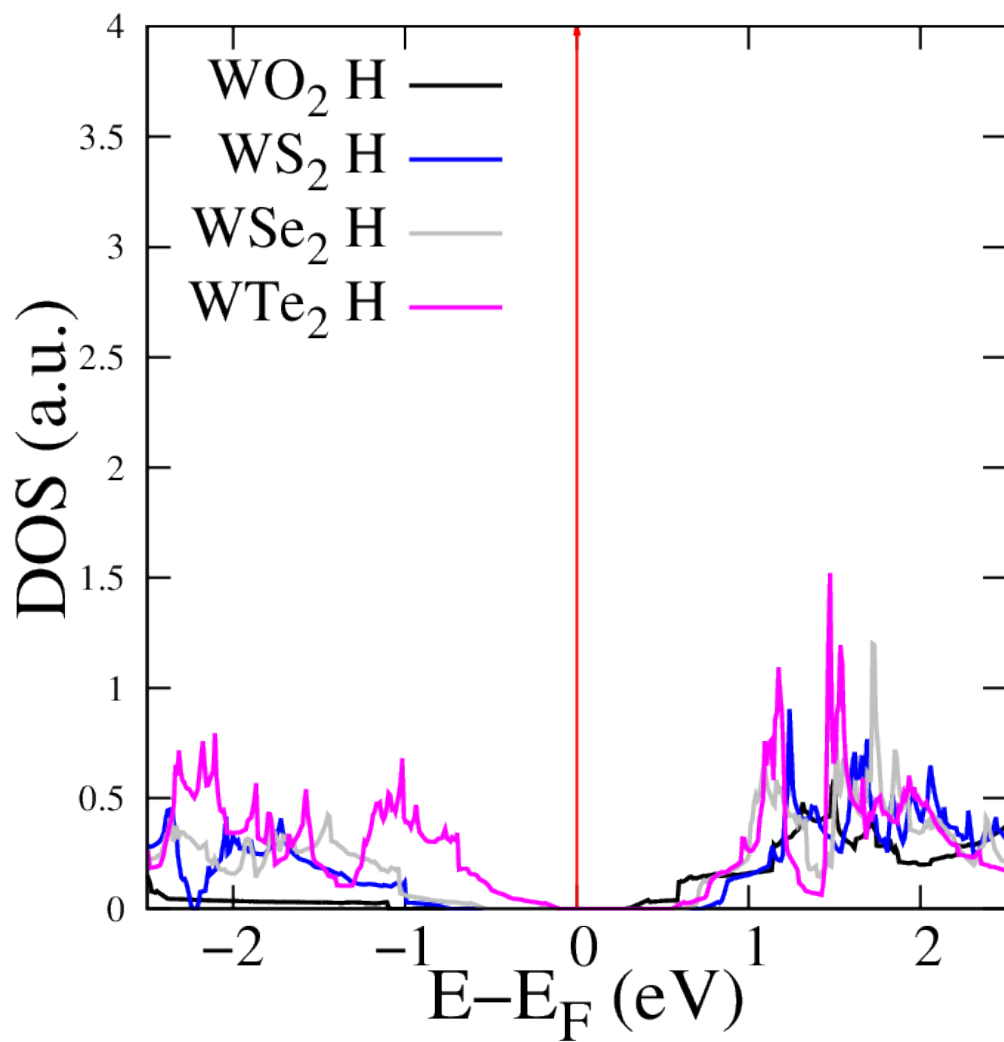

**Supplementary 6.** DOS of  $\text{WX}_2$ , where  $X = \text{O}, \text{S}, \text{Se}$  and  $\text{Te}$ , as obtained with FRUP.

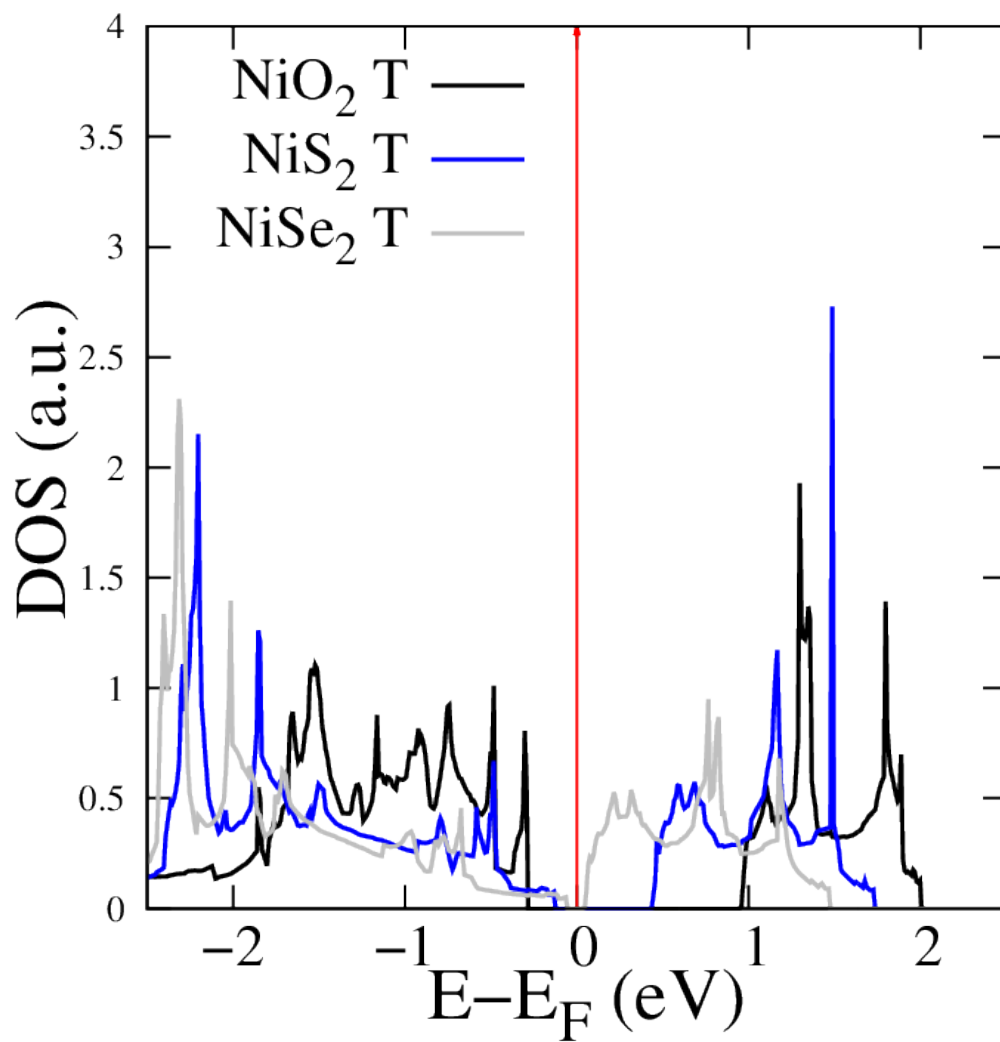

**Supplementary 7.** DOS of  $\text{NiX}_2$ , where  $X = \text{O}, \text{S}, \text{Se}$  and  $\text{Te}$ , as obtained with SRUP.



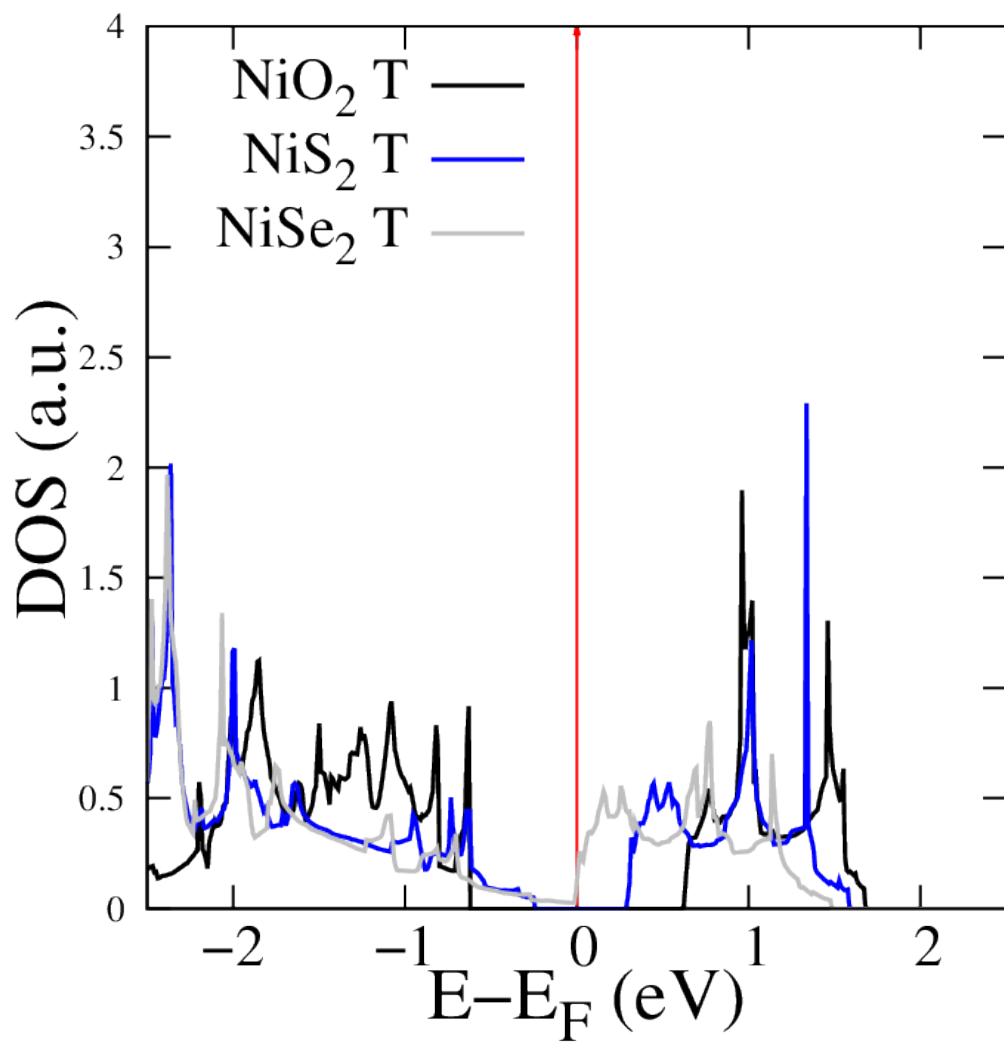

**Supplementary 8.** DOS of  $\text{NiX}_2$ , where  $X = \text{O}, \text{S}, \text{Se}$  and  $\text{Te}$ , as obtained with FRUP.

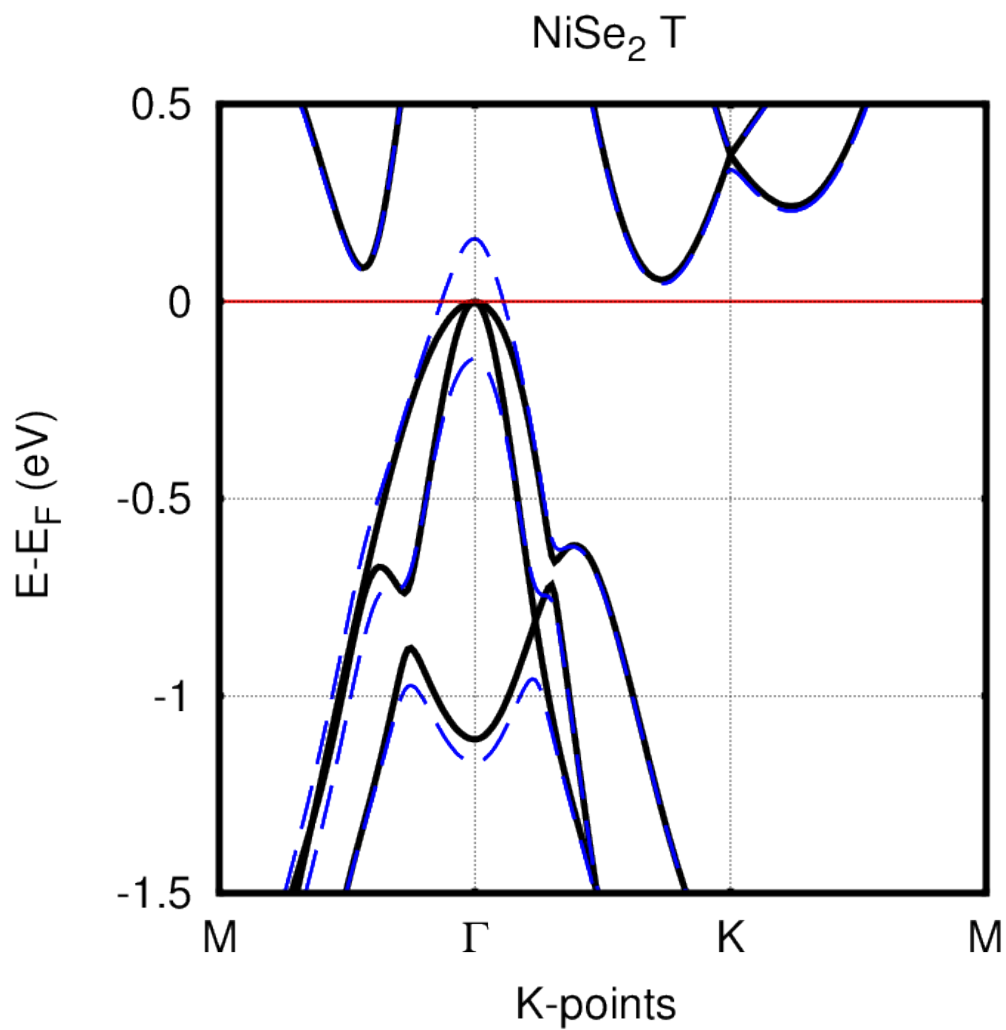

**Supplementary 9.** Zoom of electronic band structure for NiSe<sub>2</sub>, showing the splitting of valance bands at the  $\Gamma$  point. Solid black and dashed blue lines represent degenerated spins and non collinear spins, respectively. The last two valance bands (dashed blue) present a separation of 302 meV, in comparison with the same bands (solid black) when FRUP calculations are considered.

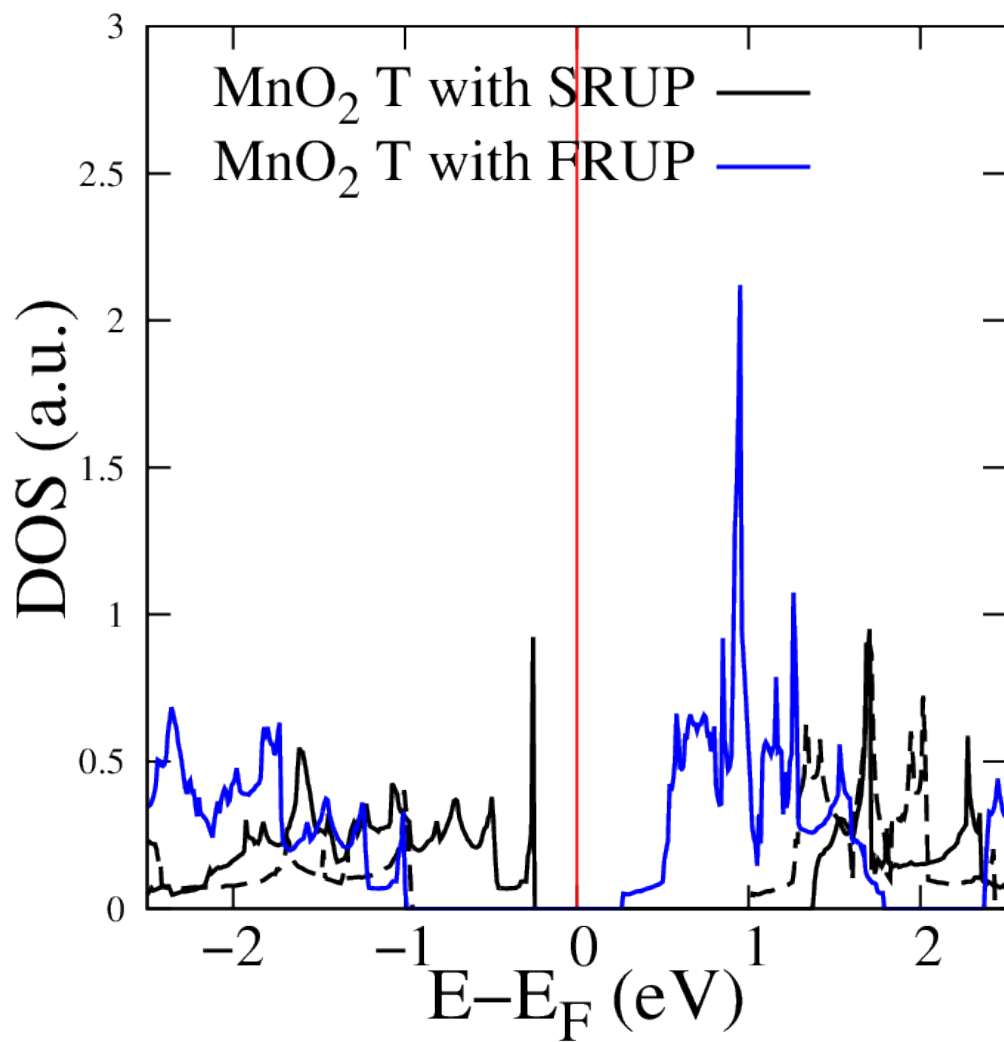

**Supplementary 10.** DOS of MnO<sub>2</sub>, as obtained with SRUP and FRUP.

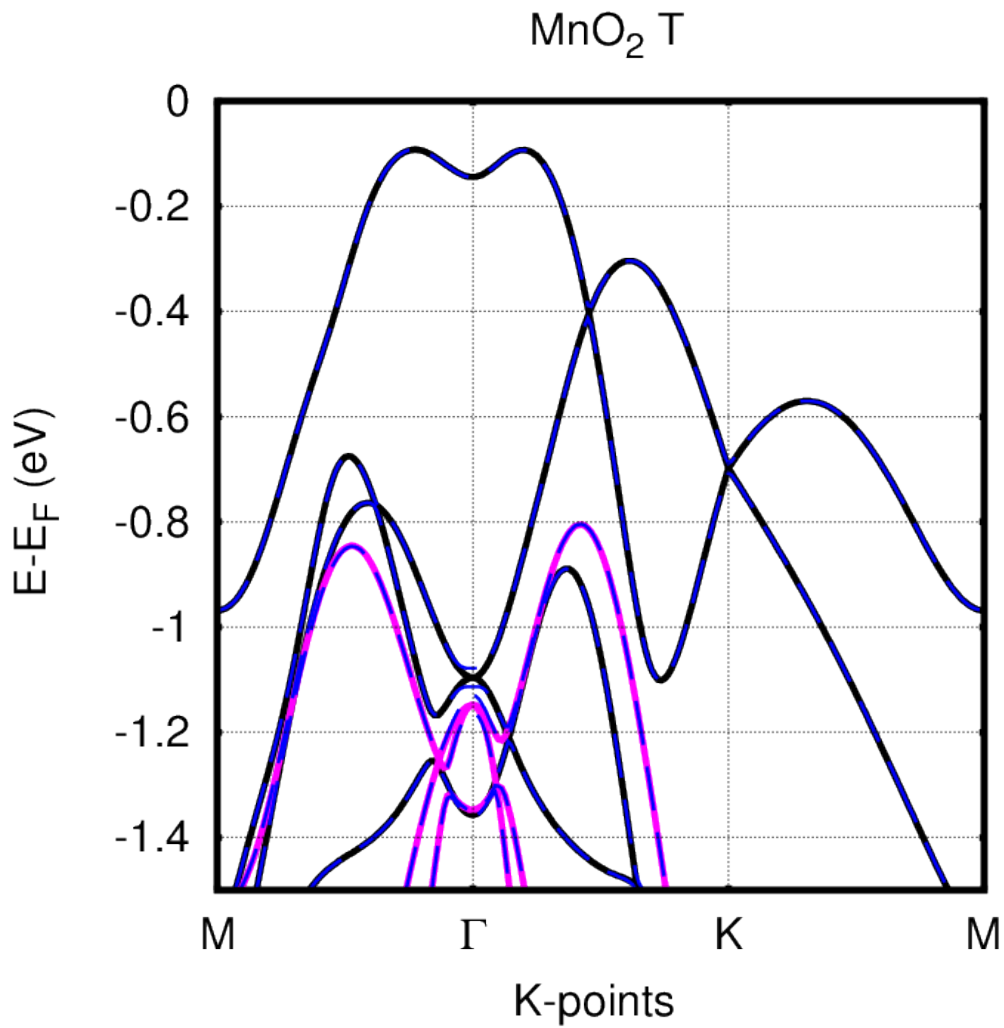

**Supplementary 11.** Zoom of electronic band structure for  $\text{MnO}_2$ , showing the splitting of the valance bands at the  $\Gamma$  point. Solid black, solid magenta and dashed blue lines represent spin up, spin down and non collinear bands, respectively. The inner bands, from -1.4 to -1 eV, present a bigger splitting in comparison with the maximum valance band.

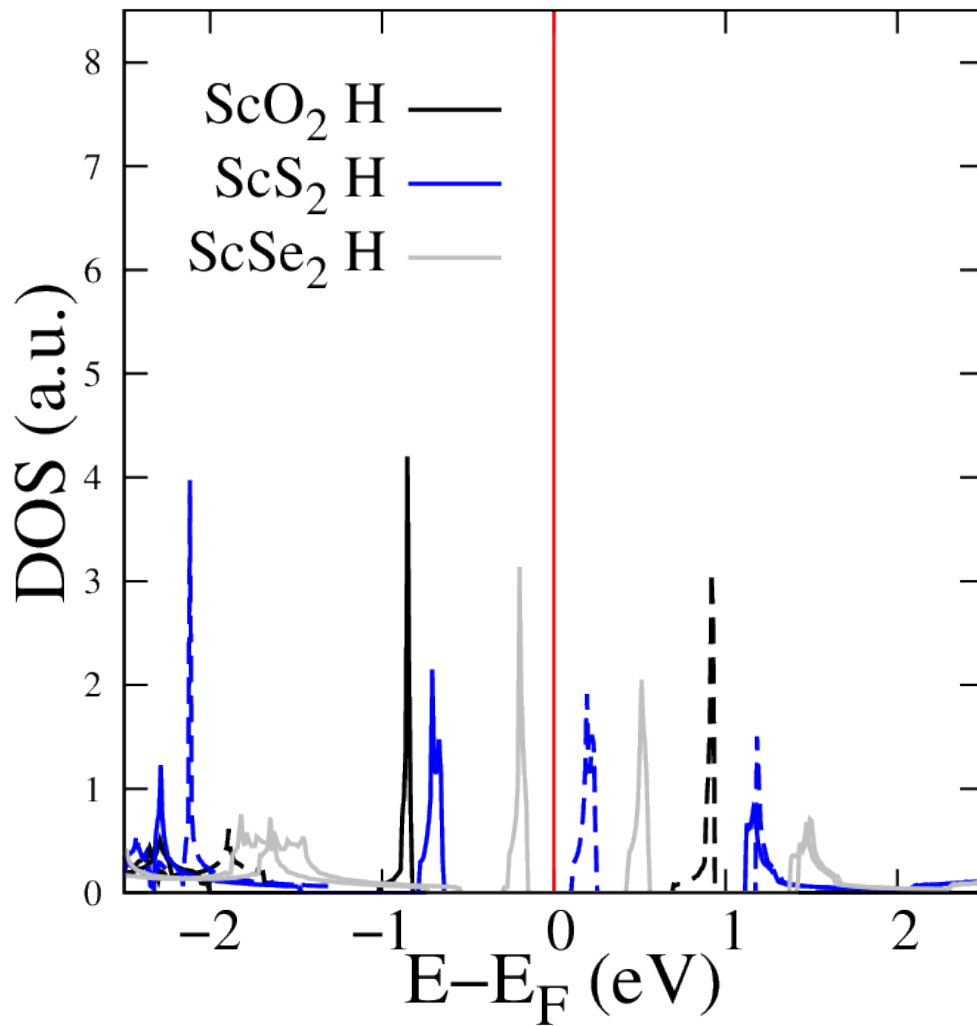

**Supplementary 12.** DOS of  $\text{ScX}_2$ , where  $X = \text{O}, \text{S}, \text{Se}$  and  $\text{Te}$ , as obtained with SRUP.

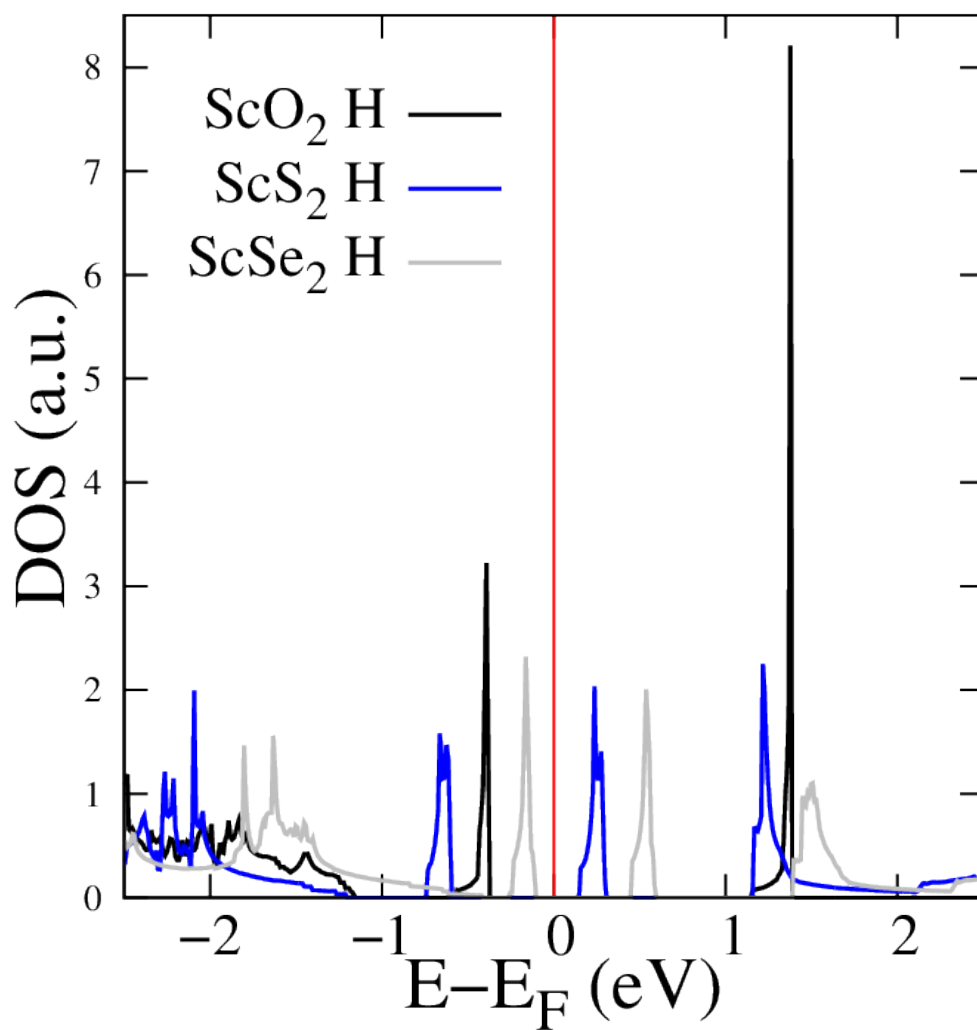

**Supplementary 13.** DOS of  $\text{ScX}_2$ , where  $X = \text{O}, \text{S}, \text{Se}$  and  $\text{Te}$ , as obtained with FRUP.

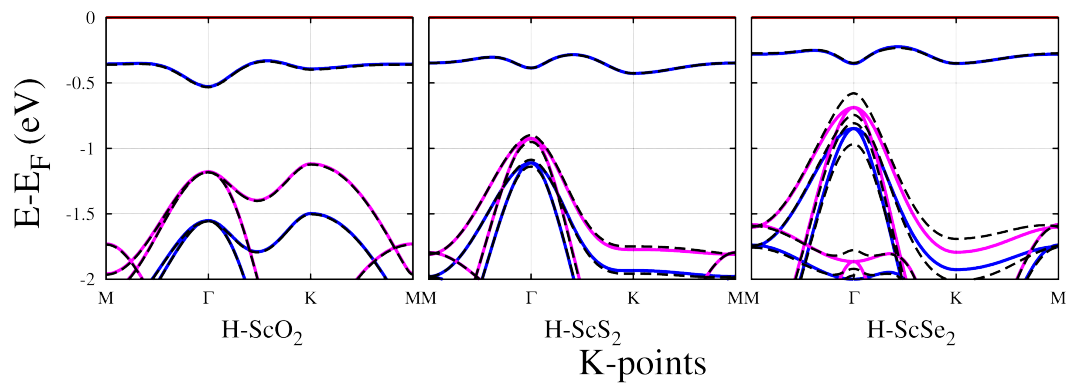

**Supplementary 14.** Electronic band structure of magnetic semiconductors  $2\text{D-MX}_2$ . Solids (blue and magenta) and dash (black) lines represent the calculation without (spin up and spin down) and with spin orbit interaction.

## WTe<sub>2</sub> H structure

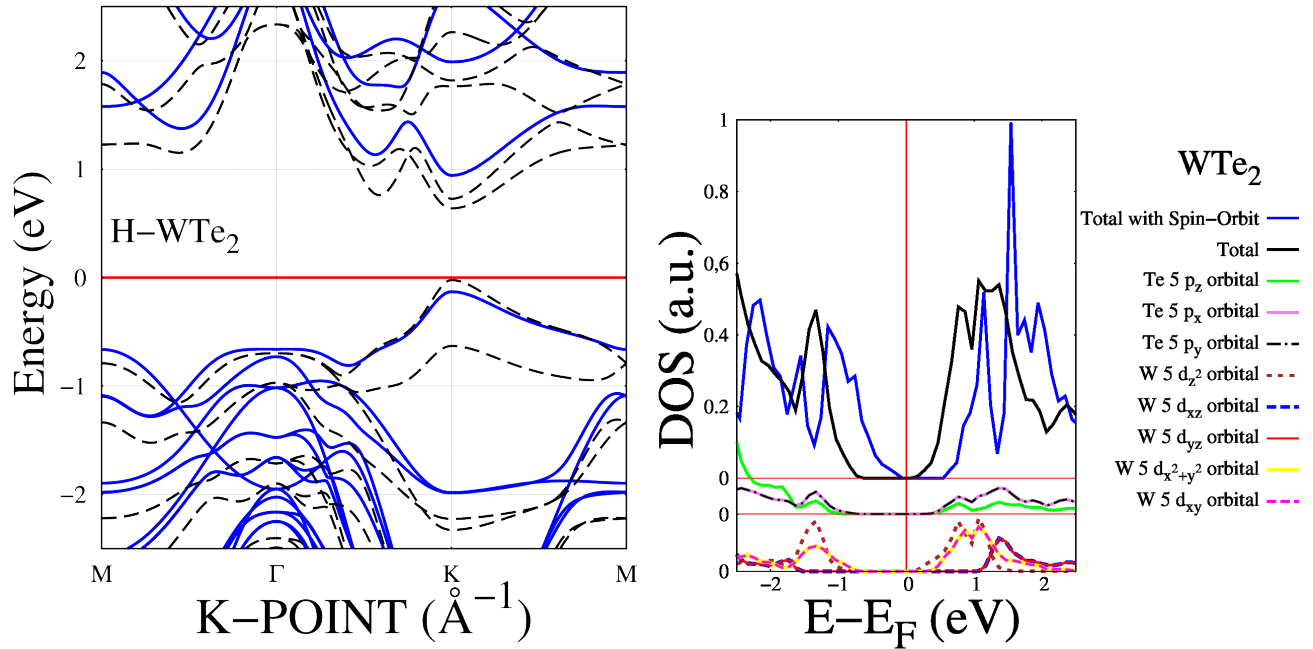

**Supplementary 15.** WTe<sub>2</sub> metastable semiconductor H structure. Left: Electronic band structure of nonmagnetic H-WTe<sub>2</sub> semiconductor calculated with spin orbit interaction (dash-black) and without it (solid-blue). Right: DOS and orbital-projected DOS for WTe<sub>2</sub>.  $d_{z^2}$  (dash brown),  $d_{x^2+y^2}$  (solid yellow) and  $d_{xy}$  (dash pink) are the main SRUP orbitals contributors from the VBM to the DOS (solid black). The major effect of the spin orbit reflects in the dispersion of these orbitals (solid blue).  $p$  and  $d$  orbitals are shifted for clarity.

## Structures reported in the Inorganic Crystal Structure Data (ICSD)

CrS<sub>2</sub> ICSD 75420

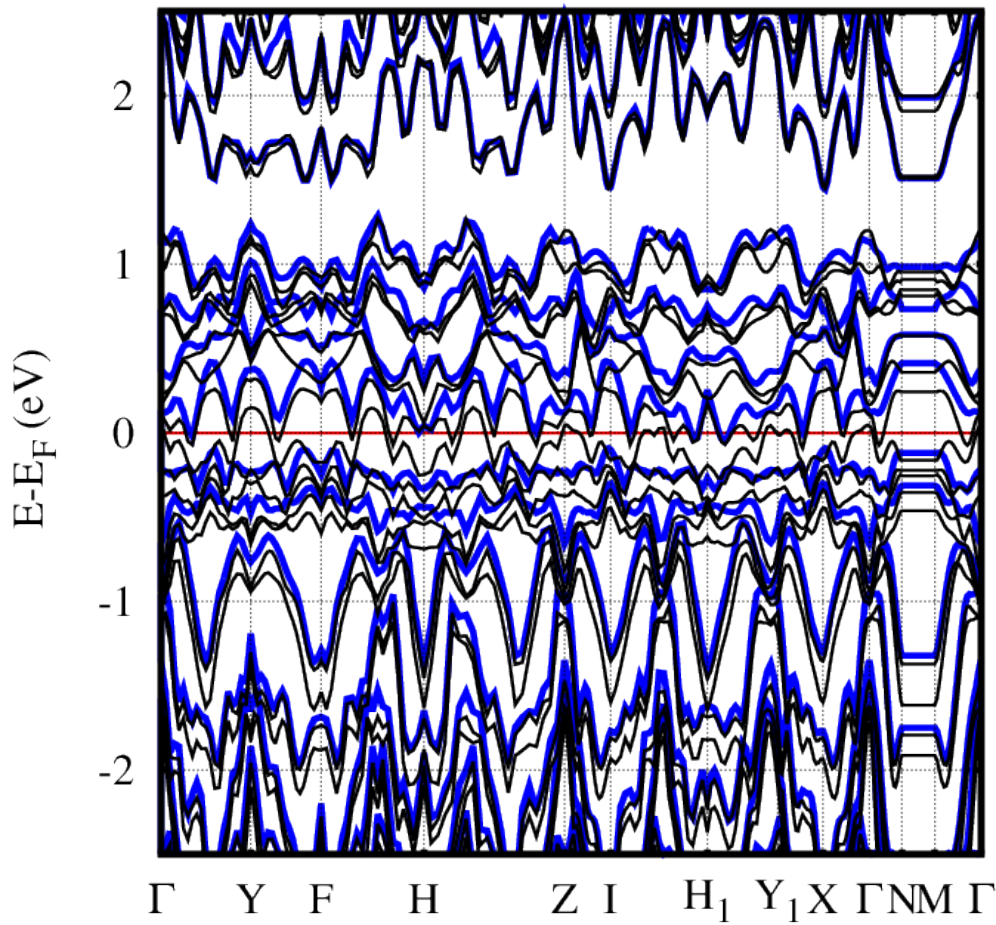

**Supplementary 16.** Band structure calculation of CrS<sub>2</sub>. The initial structure of CrS<sub>2</sub> was taken from ICSD (75420) and then geometrical optimized. The wave vector path is taken from the suggestion of Ref.<sup>1</sup> The system is nonmagnetic and magnetic metallic ( $1.09 \mu_B$ ) when calculated with SRUP (blue) and FRUP (black) respectively. The highest occupied band has splitting with a value of 144 meV at  $\Gamma$  point.



### CrS<sub>2</sub> ICSD 75420

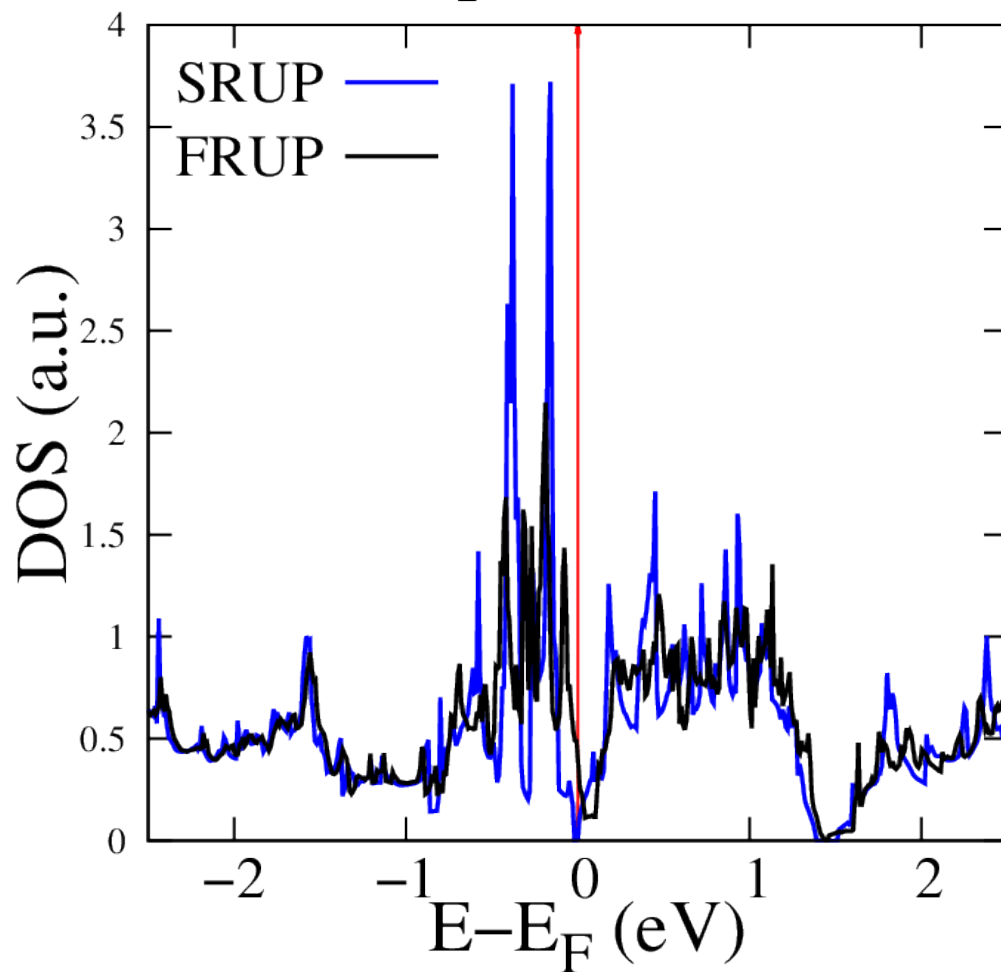

**Supplementary 17.** DOS of CrS<sub>2</sub>, as obtained with SRUP (blue) and FRUP (black).

### CrSe<sub>2</sub> ICSD 626718

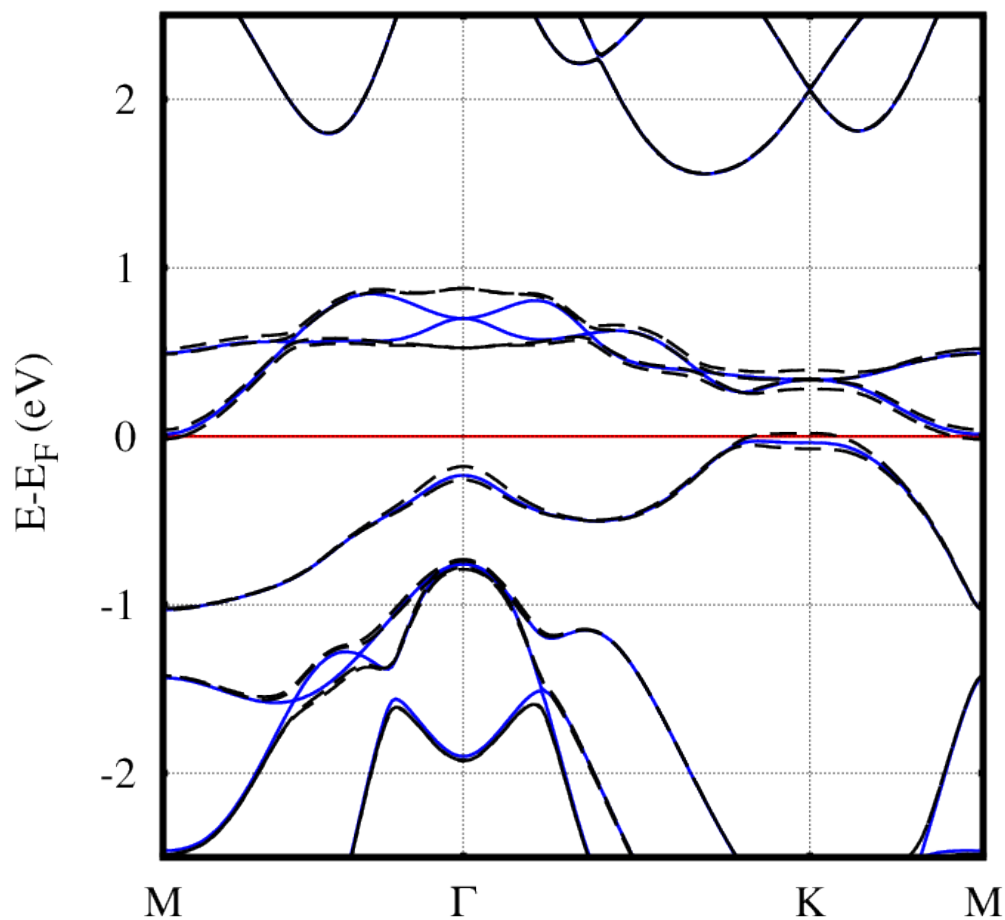

**Supplementary 18.** Band structure calculation of CrSe<sub>2</sub>. The initial structure of CrS<sub>2</sub> was taken from ICSD (626718) and then geometrical optimized. The system is nonmagnetic and magnetic metallic ( $0.08 \mu_B$ ) when calculated with SRUP (blue) and FRUP (black) respectively. The highest occupied band has splittings with values of 80 and 91 meV at  $\Gamma$  and K point, respectively.

CrSe<sub>2</sub> ICSD 626718

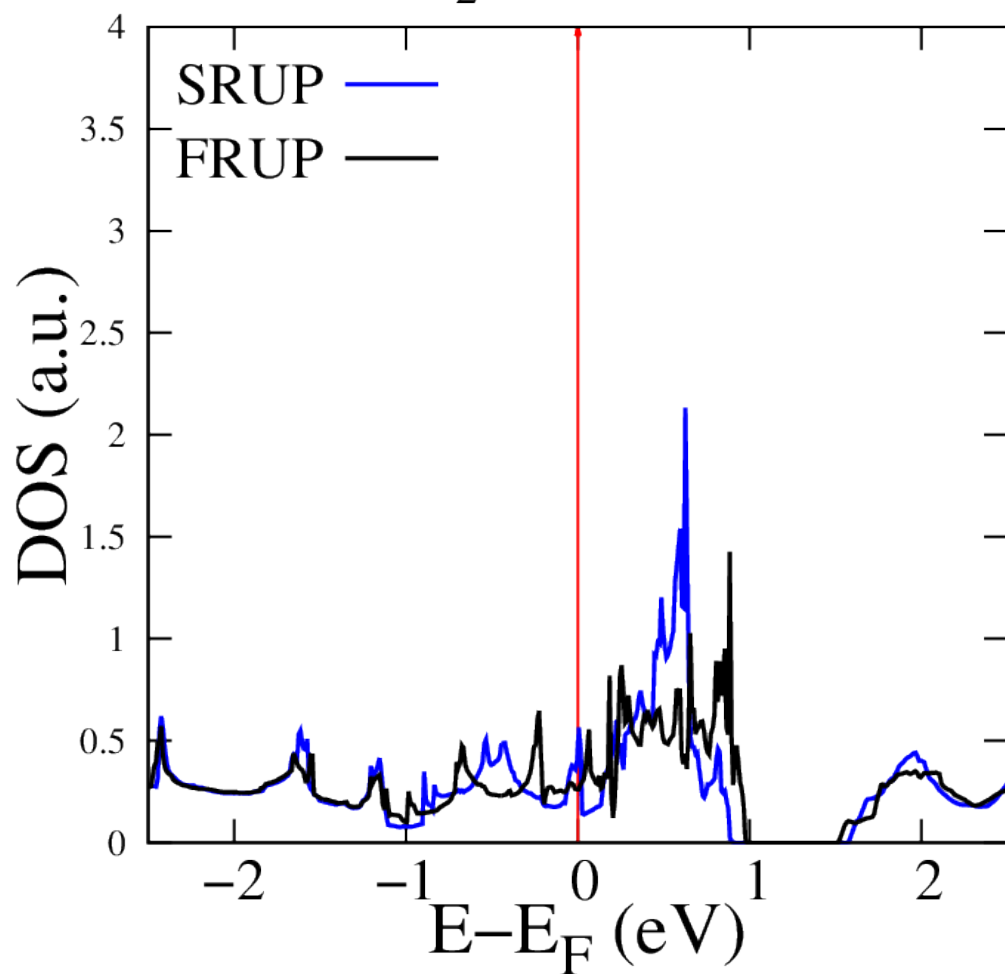

**Supplementary 19.** DOS of CrSe<sub>2</sub>, as obtained with SRUP (blue) and FRUP (black).

### CrTe<sub>2</sub> ICSD 152836

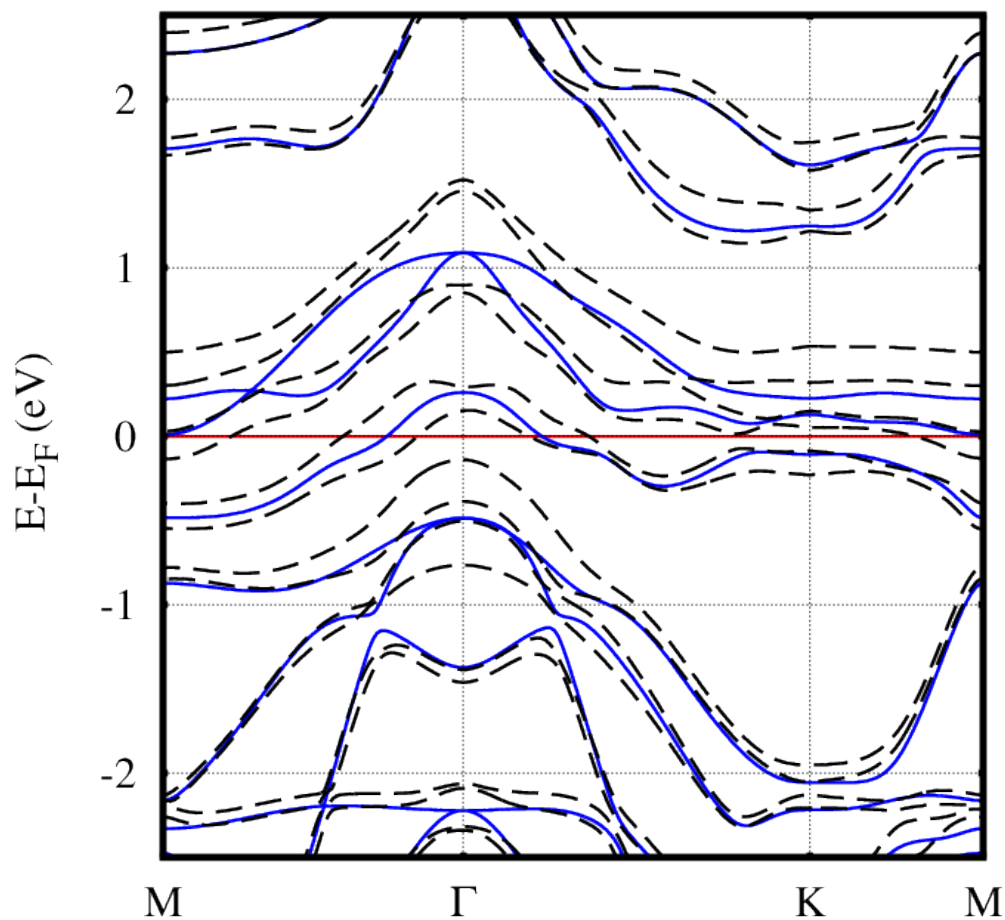

**Supplementary 20.** Band structure calculation of CrTe<sub>2</sub>. The initial structure of CrSe<sub>2</sub> was taken from ICSD (152836) and then geometrical optimized. The system is nonmagnetic and magnetic metallic ( $0.33 \mu_B$ ) when calculated with SRUP (blue) and FRUP (black) respectively. The highest occupied band has splittings with values of 147 and 140 meV at  $\Gamma$  and  $K$  point, respectively.

### CrTe<sub>2</sub> ICSD 152836

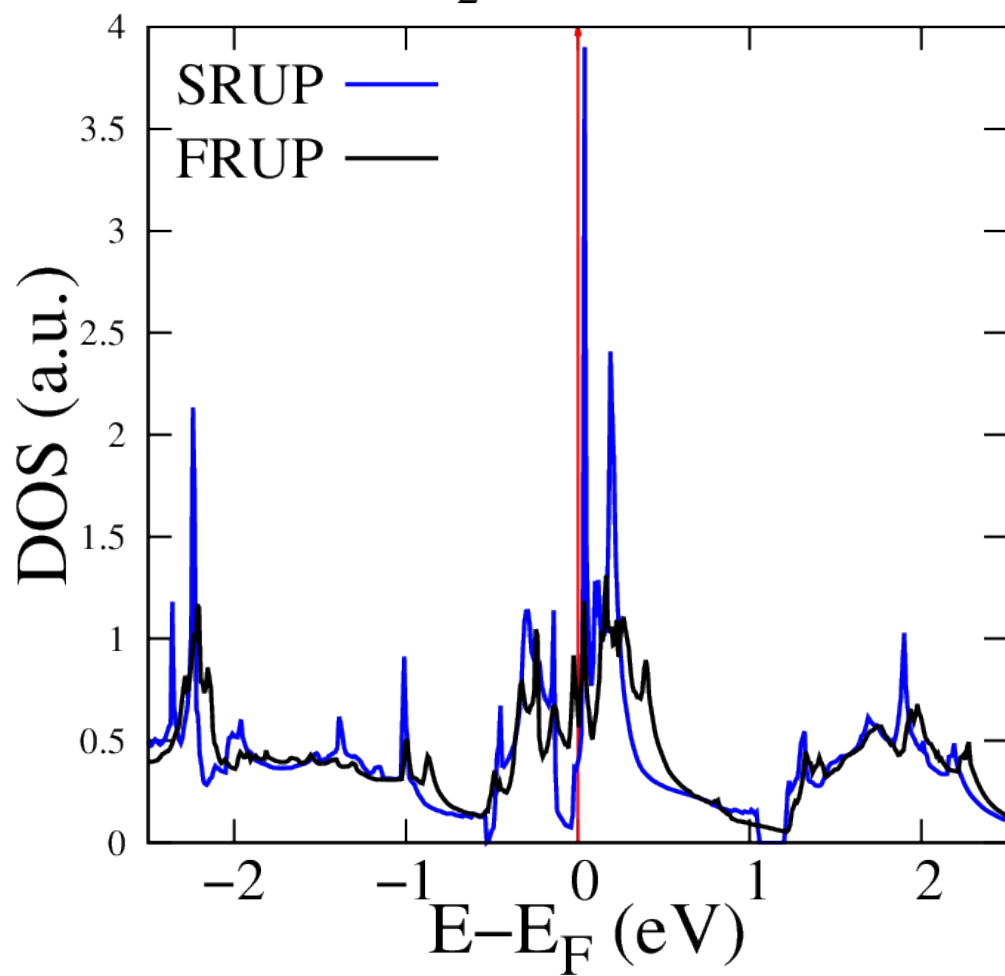

**Supplementary 21.** DOS of CrTe<sub>2</sub>, as obtained with SRUP(blue) and FRUP (black)

### WTe<sub>2</sub> ICSD 73323

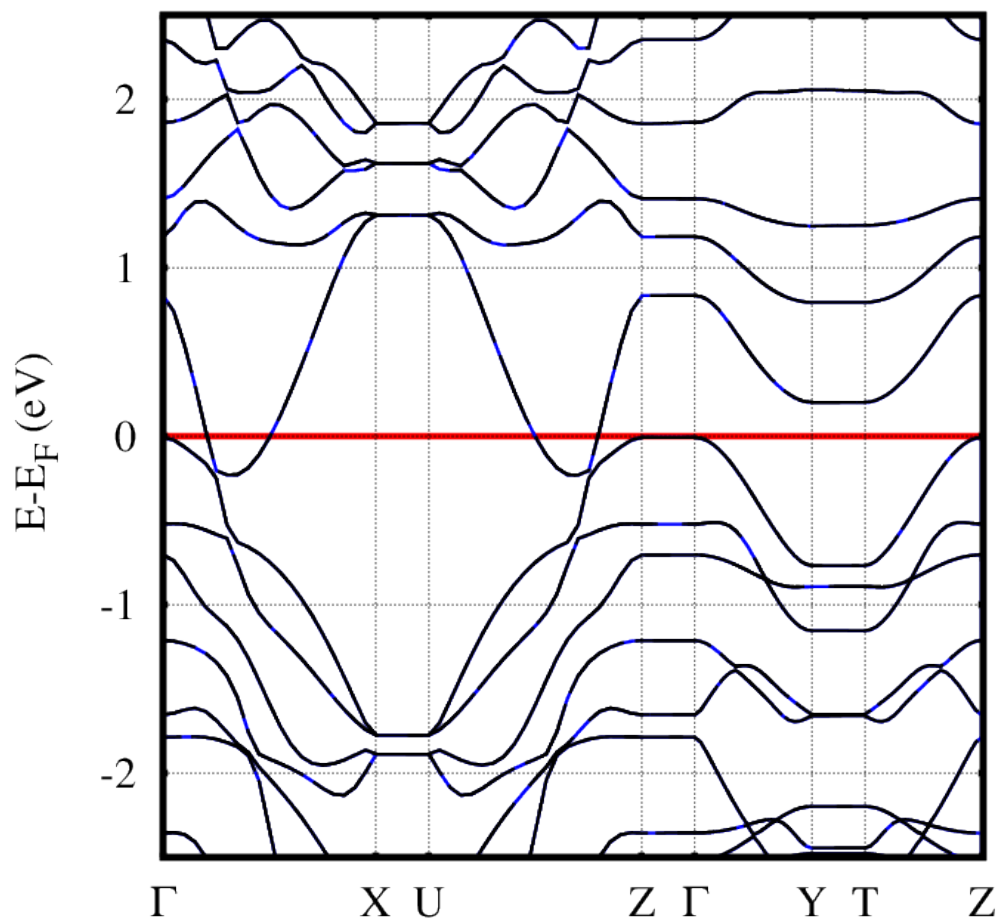

**Supplementary 22.** Band structure calculation of WTe<sub>2</sub>. The initial structure of WTe<sub>2</sub> was taken from ICSD (73323) and then geometrical optimized. The system is metallic with both approximations: SRUP (blue) and FRUP (black).

### WTe<sub>2</sub> ICSD 73323

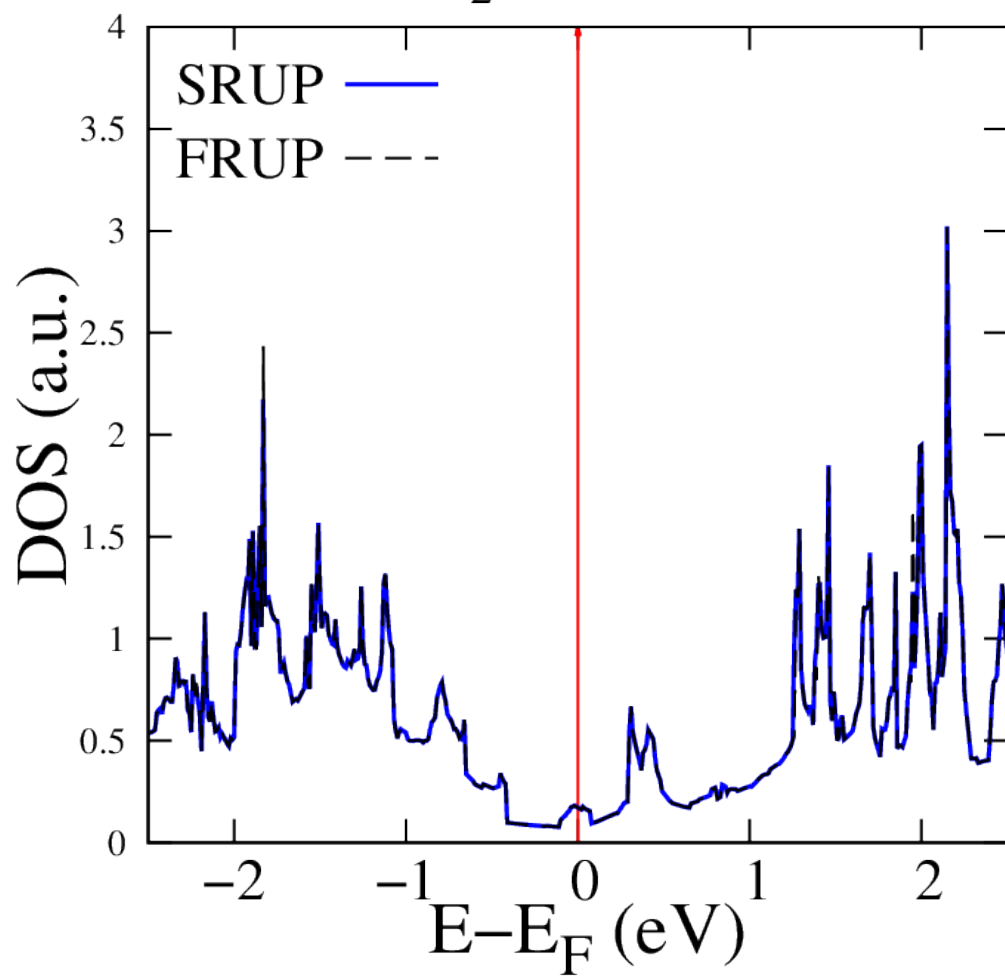

**Supplementary 23.** DOS of WTe<sub>2</sub>, as obtained with SRUP (blue) and FRUP (black).

**Atomic coordinates** In this section, the relaxed atomic positions are presented. For those systems which 3D crystals exist, their ICSD number are included. Furthermore, the crystal coordinates are taken in order to build the monolayer. When the coordinates are indexed with **Relaxed**, the structure corresponds to the relaxed hexagonal structure with  $a = b$  and a distance of 10 Å between layers. Otherwise, for the ICSD data, the crystal structure is explicitly provided.

**ScX<sub>2</sub>**

**ScO<sub>2</sub>**

**Relaxed**

a=3.22 Å

Atomic coordinates (Å)

Sc 0.000 1.8610 0.000

O 1.612 0.9307 1.034

O 1.612 0.9307 -1.034

**ScS<sub>2</sub>**

**Relaxed** a=3.79 Å

Atomic coordinates (Å)

Sc 0.000 2.188 0.000

S 1.895 1.094 1.356

S 1.895 1.094 -1.356

**ScSe<sub>2</sub>**

**Relaxed**

a=3.95 Å

Atomic coordinates (Å)

Sc 0.000 2.281 0.000

Se 1.975 1.140 1.465

Se 1.975 1.140 -1.465

**CrX<sub>2</sub>**

**CrO<sub>2</sub>**

**Relaxed**

a=2.63 Å

Atomic coordinates (Å)

Cr 0.000 1.5160 0.000

O 1.313 0.7579 1.156

O 1.313 0.7579 -1.156

**CrS<sub>2</sub>**

**ICSD 75420**

a=3.46 Å

b=5.79 Å

The distance between layers is 10 Å

$\alpha = 95.54$

Atomic coordinates (Å)

S -0.17587 1.81319 -1.36305

S 1.27480 4.69310 -1.36305

S -0.38280 3.94663 1.36305

S 1.62653 1.06672 1.36305

Cr 0.00000 0.00000 0.00000

Cr 1.45067 2.87991 0.00000

**ICSD 75420 after geometrical relaxation**

a=3.18 Å

b=6.10 Å

The distance between layers is 10 Å

$\alpha = 95.54$

Atomic coordinates (Å)

S -0.16151 1.66520 -1.25180

S 1.17075 4.31006 -1.25180

S -0.35156 3.62451 1.25180

S 1.49378 0.97965 1.25180

Cr 0.00000 0.00000 0.00000

Cr 1.33226 2.64486 0.00000

**Relaxed**

a=3.05 Å

Atomic coordinates (Å)

Cr 0.000 1.7590 0.000

S 1.524 0.8796 1.464

S 1.524 0.8796 -1.464

**CrSe<sub>2</sub>**

**ICSD 626718**

a=3.40 Å

The distance between layers is 10 Å

Atomic coordinates (Å)

Cr 0.00000 0.00000 0.00000

Se 0.00000 1.96240 1.47872

Se 1.69949 0.98120 -1.47872

**ICSD 626718 after geometrical relaxation**

a=3.31 Å

The distance between layers is 10 Å

Atomic coordinates (Å)

Cr 0.000 0.000 0.000

Se 0.000 1.911 1.440

Se 1.655 0.955 -1.440

**Relaxed**

a=3.22 Å

Atomic coordinates (Å)

Cr 0.000 1.8570 0.000

Se 1.608 0.9285 1.571

Se 1.608 0.9285 -1.571

**CrTe<sub>2</sub>**

**ICSD 152836**

This ICSD corresponds to TlCrTe<sub>2</sub>. The thallium atoms have been intentionally removed in order to build the *T* CrTe<sub>2</sub>.

a=4.02 Å



The distance between layers is 10 Å  
Cr 0.000 0.000 3.968  
Te 0.000 2.318 2.507  
Te 2.008 1.159 -2.507

#### ICSD 152836 after geometrical relaxation

This ICSD corresponds to  $\text{TlCrTe}_2$ . The thallium atoms have been intentionally removed in order to build the  $T$   $\text{CrTe}_2$ .  
 $a=3.73$  Å  
The distance between layers is 10 Å  
Cr 0.000 0.000 3.686  
Te 0.000 2.154 2.329  
Te 1.865 1.077 -2.329

#### Relaxed $a=3.48$ Å

Atomic coordinates (Å)  
Cr 0.000 2.007 0.000  
Te 1.738 1.003 1.706  
Te 1.738 1.003 -1.706

#### $\text{MnO}_2$

##### Relaxed

$a=2.96$  Å  
Atomic coordinates (Å)  
Mn 1.482 0.8558 -0.9514  
O 0.000 1.7120 -1.9030  
O 0.000 0.0000 0.0000

#### $\text{NiX}_2$

##### $\text{NiO}_2$

##### Relaxed

$a=2.86$  Å  
Atomic coordinates (Å)  
Ni 1.43273 0.82719 -0.95864  
O 0.00000 1.65437 -1.91729  
O 0.00000 0.00000 0.00000

#### $\text{NiS}_2$

##### Relaxed

$a=3.33$  Å  
Atomic coordinates (Å)  
Ni 1.66387 0.96064 -1.18092  
S 0.00000 1.92128 -2.36189  
S 0.00000 0.00000 0.00000

#### $\text{NiSe}_2$

##### Relaxed

$a=3.51$  Å  
Atomic coordinates (Å)  
Ni 1.75280 1.01198 -1.27299  
Se 0.00000 2.02396 -2.54599  
Se 0.00000 0.00000 0.00000

#### $\text{MoX}_2$

##### $\text{MoO}_2$

##### Relaxed

$a=2.84$  Å  
Atomic coordinates (Å)  
Mo 0.00000 1.64017 0.00000  
O 1.42042 0.82008 1.23428  
O 1.42042 0.82008 -1.23428

#### $\text{MoS}_2$

##### ICSD 644254

$a=3.16$  Å

The distance between layers is 10 Å

Atomic coordinates (Å)  
Mo 0.91293 1.58125 3.07555  
S 1.82587 0.00000 4.65638  
S 1.82587 0.00000 1.49472

##### Relaxed

$a=3.20$  Å  
Atomic coordinates (Å)  
Mo 0.00000 1.84679 0.00000  
S 1.59937 0.92339 1.55911  
S 1.59937 0.92339 -1.55911

#### $\text{MoSe}_2$

##### ICSD 644334

$a=3.29$  Å

The distance between layers is 10 Å

Atomic coordinates (Å)  
Mo 0.94916 1.64400 3.22500  
Se 1.89833 0.00000 4.83750  
Se 1.89833 0.00000 4.83750

##### Relaxed

$a=3.33$  Å  
Atomic coordinates (Å)  
Mo 0.00000 1.92299 0.00000  
Se 1.66536 0.96149 1.67279  
Se 1.66536 0.96149 -1.67279

#### $\text{MoTe}_2$

##### ICSD 15431

$a=3.52$  Å

The distance between layers is 10 Å

Atomic coordinates (Å)  
Mo 1.01585 1.75950 3.49100  
Te 2.03170 0.00000 5.23650  
Te 2.03170 0.00000 1.74550

##### Relaxed

$a=3.55$  Å  
Atomic coordinates (Å)  
Mo 0.00000 2.04853 0.00000

Te 1.77408 1.02426 1.81336  
Te 1.77408 1.02426 -1.81336

### **WX<sub>2</sub>**

#### **WO<sub>2</sub>**

##### **Relaxed**

a=2.83 Å  
Atomic coordinates (Å)  
W 0.00000 1.63720 0.00000  
O 1.41786 0.81860 1.23579  
O 1.41786 0.81860 -1.23579

### **WS<sub>2</sub>**

#### **ICSD 202366**

a=3.15 Å  
The distance between layers is 10 Å  
Atomic coordinates (Å)  
W 0.91025 1.57660 3.08075  
S 1.82050 0.00000 4.65193  
S 1.82050 0.00000 1.50957

##### **Relaxed**

a=3.19 Å  
Atomic coordinates (Å)  
W 0.00000 1.84312 0.00000  
S 1.59619 0.92156 1.56567  
S 1.59619 0.92156 -1.56567

### **WSe<sub>2</sub>**

#### **ICSD 40752**

a=3.28 Å  
The distance between layers is 10 Å  
Atomic coordinates (Å)  
W 0.94743 1.64100 3.24000  
Se 1.89486 0.00000 4.91054  
Se 1.89486 0.00000 1.56946

##### **Relaxed**

a=3.33 Å  
Atomic coordinates (Å)  
W 0.00000 1.92042 0.00000  
Se 1.66313 0.96021 1.67874  
Se 1.66313 0.96021 -1.67874

### **WTe<sub>2</sub>**

#### **ICSD 73323**

a=3.47 Å  
b=6.25 Å  
The distance between layers is 10 Å  
Atomic coordinates (Å)  
Te 0.000000000 5.359139218 9.185182184  
Te 0.000000000 1.294902064 5.661380005  
Te 1.738478739 4.383932268 5.044161988  
Te 1.738478739 2.210181914 8.566575122  
W 1.738478739 6.000216466 7.222265492  
W 0.000000000 3.753228523 7.008914166

##### **ICSD 73323 after geometrical relaxation**

a=3.47 Å  
b=6.32 Å  
The distance between layers is 10 Å  
Atomic coordinates (Å)  
Te 0.000000000 5.427947354 9.198842837  
Te 0.000000000 1.320063145 5.597634523  
Te 1.729329861 2.210494267 8.594200608  
Te 1.729329861 4.405277269 8.974162489  
W 0.000000000 3.794891687 6.997644483  
W 1.729329861 6.037553554 7.194448933

##### **Relaxed**

a=3.56 Å  
Atomic coordinates (Å)  
W 0.00000 2.05601 0.00000  
Te 1.78056 1.02801 1.81232  
Te 1.78056 1.02801 -1.81232

## **References**

1. Setyawan, W. & Curtarolo, S. High-throughput electronic band structure calculations: Challenges and tools. *Computational Materials Science* **49**, 299–312 (2010).
